# Supplementary material for: Light Quality and Sucrose-Regulated Detached Ripening of Strawberry with Possible Involvement of Abscisic Acid and Auxin Signaling
Source: MDPI journal article supplement (doi:10.3390/ijms24065681), 2023-03-16
Supplement: s1 [file s1]

**Table S1.** Primers used for qRT-RT

| Gene             | Forward primers (5'-3')  | Reverse primers (5'-3')  |
|------------------|--------------------------|--------------------------|
| <i>ABI4</i>      | TACGACCGAGCCGCTATAAT     | CGTAAGGATGAGCCGAAGAG     |
| <i>SnRK2.6</i>   | GCTACACTCGCAACCAAAATC    | ACCCACAAGACCAGACATC      |
| <i>AUX/IAA11</i> | TGGTGGTCAGGAGCATGATA     | TTAGCCTCTTCACGGA ACTAAGA |
| <i>ARF6</i>      | AGTTTGTAATAGTGTGTGGTGCAT | CTGCATTGGGACAGACTTCAG    |
| <i>ACTIN</i>     | TTCACGAGACCACCTATAACTC   | GCTCATCCTATCAGCGATT      |
